1 **Transgenic  $\alpha\beta$  TCR tonic signaling is leukemogenic while strong stimulation is**  
2 **leukemia-suppressive**

3 Telmo A. Catarino,<sup>1,2,3</sup> Ivette Pacheco-Leyva,<sup>1,2</sup> João L. Pereira,<sup>1,2</sup> Marina Baessa,<sup>1,2</sup>  
4 Nuno R. dos Santos<sup>1,2,4</sup>

5

6 <sup>1</sup>i3S - Instituto de Investigação e Inovação em Saúde, Universidade do Porto, Porto,  
7 Portugal.

8 <sup>2</sup>Institute of Molecular Pathology and Immunology of the University of Porto  
9 (IPATIMUP), Porto, Portugal.

10 <sup>3</sup>Graduate Program in Areas of Basic and Applied Biology, Instituto de Ciências  
11 Biomédicas Abel Salazar, Universidade do Porto, Porto, Portugal

12 <sup>4</sup>Centre for Biomedical Research (CBMR), University of Algarve, Faro, Portugal.

13

14 Running title: Dual function for  $\alpha\beta$  TCR in leukemogenesis

15

16 Text word count: 4304

17 Number of figures: 4

18 Number of references: 42

19

20 **Abstract**

21           The pre-T cell receptor (TCR) and TCR complexes are frequently expressed in  
22 T-cell acute lymphoblastic leukemia (T-ALL), an aggressive T cell precursor  
23 malignancy. Although mutations in TCR components are infrequent in T-ALL, earlier  
24 research indicated that transgenic  $\alpha\beta$  TCR expression in mouse T cell precursors  
25 promoted T-ALL development. However, we recently found that stimulation of TCR  
26 signaling in T-ALL induced leukemic cell apoptosis and suppressed leukemia. Our aim  
27 was to elucidate if a given  $\alpha\beta$  TCR complex has a dual role in leukemogenesis  
28 depending on the nature of the stimulus. We demonstrate that transgenic expression of  
29 the Marilyn  $\alpha\beta$  TCR, specific for the H-Y male antigen presented by major  
30 histocompatibility complex class II, triggers T-ALL development exclusively in female  
31 mice. This T-ALL exhibited *Notch1* mutations, *Cdkn2a* copy number loss, immature  
32 immunophenotype and infiltrated both lymphoid and non-lymphoid organs.  
33 Furthermore, leukemic cells expressed surface CD5, a marker of tonic TCR signaling.  
34 T-ALL efficiently developed in *Rag2*-deficient Marilyn transgenic females, indicating  
35 that *Rag2*-mediated recombination is not implicated in this T-ALL model. Remarkably,  
36 exposure of Marilyn female T-ALL to male antigen in recipient mice resulted in T-ALL  
37 apoptosis and prolonged mouse survival. These findings underscore that the same  $\alpha\beta$   
38 TCR complex has a dual role in T-ALL in that its tonic stimulation is leukemogenic,  
39 while strong stimulation is leukemia-suppressive.

40

## 41 Introduction

42 The pre-T cell receptor (TCR) and  $\alpha\beta$  TCR are critical protein complexes for T cell  
43 development. Pre-TCR expression in CD4<sup>-</sup>CD8<sup>-</sup> double-negative (DN) thymocytes  
44 induces their survival, proliferation and maturation through the  $\beta$ -selection  
45 checkpoint,<sup>1,2</sup> whereas surface expression of the  $\alpha\beta$  TCR in CD4<sup>+</sup>CD8<sup>+</sup> double-positive  
46 (DP), thymocytes drives thymic positive and negative selection to establish major  
47 histocompatibility complex (MHC) restriction and eliminate autoreactive thymocytes.<sup>3</sup>  
48 The pre-TCR, TCR and CD3 proteins are frequently expressed in T-cell acute  
49 lymphoblastic leukemia (T-ALL).<sup>4</sup> Although T-ALL is genetically a very heterogeneous  
50 disease, with mutations detected in multiple genes, a number of genetic alterations  
51 have been recurrently reported for T-ALL, including *CDKN2A* loss of function,  
52 *NOTCH1*-activating mutations, and mutations in JAK/STAT signaling pathway genes  
53 (e.g. *IL7R*, *JAK3*, *JAK1*, and *STAT5B*).<sup>5</sup> Mutations in components of the TCR signaling  
54 machinery are rare,<sup>5</sup> but the Lck kinase, a key member of the pre-TCR and TCR  
55 signaling pathways, has been shown to be activated in T-ALL and put forward as a  
56 potential therapeutic target.<sup>6-9</sup> These observations hint that pre-TCR signaling can  
57 promote human T cell leukemogenesis. In this line, genetic inactivation of the pre-TCR  
58 complex (e.g. CD3  $\epsilon$ , pT  $\alpha$  or Rag1/2 deficiency) was shown to delay T-ALL  
59 development in several mouse models.<sup>10-14</sup> In contrast, the impact and function of TCR  
60 signaling in T-ALL development and progression remains controversial. While  
61 transgenic TCR expression was shown to promote mouse T-ALL development in  
62 cooperation with STAT5 overexpression or deficiency of p53 or Tpl2 proteins,<sup>15-17</sup>  
63 expression of endogenous  $\alpha\beta$  TCR or MHC-dependent antigen presentation were not  
64 required for leukemogenesis in the ETV6::JAK2 or TAL/LMO transgenic mouse  
65 models.<sup>13,14</sup> Indicating that TCR could rather have an antagonistic action in T-ALL, T-  
66 ALL onset in a *Pten*-deficient mouse model was accelerated by TCR genetic  
67 inactivation and delayed by expression of transgenic TCR.<sup>18</sup> In this line, it was also  
68 reported that strong agonist TCR stimulation of mouse ETV6::JAK2-driven T-ALL or  
69 patient T-ALL was anti-leukemic and induced a transcriptional program similar to that  
70 involved in thymocyte negative selection.<sup>19</sup> Overall, these observations suggest that,  
71 depending on the oncogenic drivers of leukemia and degree of TCR stimulation, the  
72 TCR signaling complex might play either a leukemia-promoting or a leukemia-  
73 suppressive role.

74 Here, our aim was to investigate the role of basal versus strong TCR signaling  
75 in T-ALL leukemogenesis. In normal T cells, TCR recognition of self-peptides  
76 presented by MHC (self-pMHC) induces tonic signaling, while agonist peptides induce  
77 strong TCR signaling. Using the Marilyn transgenic TCR mouse strain, specific for the

78 H-Y male antigen, we show that tonic TCR signaling led to *Notch1*-mutated T-ALL  
79 exclusively in females. MHC-dependent agonist antigenic stimulation prevented  
80 spontaneous T-ALL development in males, induced apoptosis of female leukemic cells  
81 and hampered their leukemogenic potential. Our results support the notion that  $\alpha\beta$  TCR  
82 tonic signaling promotes T cell precursor malignant transformation and that strong  
83 signaling suppresses leukemia.

84 **Results**

85 **Transgenic expression of an  $\alpha\beta$  TCR specific for the H-Y male antigen drives**  
86 **leukemia development in female mice**

87 To study the effect of TCR expression in leukemia development, we resorted to Marilyn  
88 transgenic mice, which express an MHC class II-restricted transgenic TCR (TCR-  
89  $V\alpha 1.1/V\beta 6$ ) specific for the H-Y male antigen (HY-TCR henceforth).<sup>20</sup> In this model,  
90 male thymocytes expressing the HY-TCR are exposed to the cognate antigen (DBY  
91 peptide), through MHC class II presentation, and are eliminated by apoptosis. In  
92 contrast, HY-TCR-expressing female thymocytes undergo positive selection and  
93 differentiate as mature CD4<sup>+</sup> T cells. To verify if the transgenic Marilyn HY-TCR  
94 promoted leukemogenesis, we bred transgenic mice expressing the ETV6::JAK2 fusion  
95 protein in lymphoid cells with Marilyn mice. As expected,<sup>13</sup> all ETV6::JAK2 transgenic  
96 mice developed T-ALL expressing CD8, CD25, CD24, CD3 $\epsilon$  and TCR $\beta$  (not shown).  
97 Remarkably, co-expression of the Marilyn HY-TCR with ETV6::JAK2 accelerated  
98 spontaneous T-ALL development in females (median survival of 10.5 weeks versus 14  
99 weeks; Figure 1A). This suggests that HY-TCR tonic signaling, which is induced by  
100 TCR interaction with self-peptides presented by MHC, cooperates with the ETV6::JAK2  
101 transgene in driving leukemogenesis.

102 To determine whether HY-TCR tonic signaling alone could induce T cell  
103 malignant transformation, we monitored a cohort of both Marilyn females and males  
104 until 18 months of age. Remarkably, while most females developed fatal hematological  
105 disease (median survival of 58 weeks), none of the males did (Figure 1B). Macroscopic  
106 analyses showed that Marilyn females developed enlarged lymphoid (thymus, spleen  
107 and lymph nodes (LNs)) and non-lymphoid organs (mainly liver and kidneys) (Figure  
108 1C; Supplementary Figure 1), together with high number of blood lymphoblasts (Figure  
109 1D). Histological analyses revealed massive lymphoid cell infiltration of liver, kidneys,  
110 lungs and bone marrow (Supplementary Figure 2). These data indicate that tonic (in  
111 females) but not strong (in males) transgenic HY-TCR signaling is sufficient to induce  
112 leukemia and lymphoma development.

113

114 **Transgenic HY-TCR expression induced T-cell disease with variable**  
115 **immunophenotype**

116 Macroscopic analysis revealed two distinct groups of diseased Marilyn females: a  
117 subset with thymic lymphoma (TL; 9 cases) and a subset characterized by  
118 splenomegaly and lymphadenopathy without thymic lymphoma (non-TL; 7 cases;  
119 Figure 1E). TL females developed leukemia slightly faster and presented higher total  
120 lymphoid organ disease burden than non-TL females, suggestive of a more aggressive

121 disease course (Supplementary Figures 3A,B). For a better characterization of the  
122 hematological disease developing in different Marilyn females, we performed  
123 immunophenotyping by flow cytometry. To define the T cell maturation status, we  
124 probed expression of CD24, which is downregulated upon thymocyte maturation, CD5,  
125 which is upregulated after thymocyte positive selection, and CD44, which is expressed  
126 in memory T cells.<sup>21,22</sup> Within the TL subgroup, five mice (nos. 2, 6, 22, 33 and 40)  
127 presented thymic T cells with immature phenotype, characterized by surface  
128 expression of CD90.2, TCR-V $\beta$ 6, and CD5, low levels of CD4 and CD8, high CD24  
129 levels, and CD44 negativity (Figure 2 and Supplementary Table 1). Such  
130 immunophenotype was recapitulated in leukemic cells disseminated to the spleen, LNs,  
131 and bone marrow (Supplementary Figure 4 and not shown). Two other TL cases (nos.  
132 9 and 29) presented a more mature T cell immunophenotype, characterized by  
133 CD4<sup>+</sup>CD8<sup>-</sup>TCR-V $\beta$ 6<sup>+</sup>CD5<sup>+</sup> leukemic cells with CD44 expression (Figure 2). These cells  
134 were also present in spleen and lymph nodes (Supplementary Figure 4). Finally, and  
135 rather unexpectedly, two TL cases (nos. 3 and 34) presented a large proportion of  
136 B220-positive B cells, concomitantly with TCR-V $\beta$ 6<sup>+</sup>CD5<sup>+</sup>CD44<sup>+</sup> CD4 single-positive  
137 (SP) and CD8SP T cells (Figure 2). Of note, TL cases with immature  
138 immunophenotype, but not those with mature phenotype, could reinitiate disease in  
139 recipient syngeneic mice (Supplementary Table 1), suggesting that only the former  
140 were malignantly transformed.

141 Non-TL Marilyn females exhibited a mixture of B220<sup>+</sup> B cells and CD90.2<sup>+</sup>TCR-  
142 V $\beta$ 6<sup>+</sup>CD5<sup>+</sup>CD44<sup>+</sup> CD4SP cells in lymphoid organs (Figure 2 and Supplementary Figure  
143 4 and Table 1). Analysis of CD69 expression, a marker of TCR stimulation,<sup>21</sup> showed  
144 that TCR-V $\beta$ 6<sup>+</sup> cells from mixed B and T lymphomas were CD69-positive, indicating  
145 they experienced recent TCR stimulation (Supplementary Figure 5). This suggests that  
146 mixed B and T disease found in Marilyn female mice was driven by continuous  
147 stimulation of the HY-TCR transgene expressed in mature CD4SP or CD8SP T cells.  
148 Immature-type leukemic cells did not express CD69, suggesting that their proliferation  
149 was likely driven by oncogenic mechanisms rather than TCR stimulation.

150 We conclude that while one third (5 of 16) of Marilyn TCR transgenic females  
151 developed a transplantable immature disease, akin to T-ALL, marked by pronounced  
152 thymic enlargement, the remaining diseased mice developed a non-transplantable and  
153 heterogeneous mature T and B nonmalignant lymphoproliferation affecting the thymus,  
154 spleen, lymph nodes and other organs, with statistically significant longer delay  
155 (median survival of 40 versus 60 weeks; Supplementary Figure 6).

156

157 **Marilyn T-ALL presents *Notch1* PEST domain mutations and genetic copy**  
158 **number alterations**

159 To determine whether Marilyn T-ALL was associated with secondary genetic  
160 alterations, we first sequenced the *Notch1* exon 34 (PEST domain), where most  
161 murine T-ALL *Notch1* mutations have been found.<sup>23,24</sup> Four out of 5 Marilyn T-ALL  
162 cases analyzed carried exon 34 frameshift mutations (Supplementary Figure 7 and  
163 Table 1), while none were detected in cases of mixed T and B cell disease  
164 (Supplementary Table 1). Additionally, by performing low-coverage whole-genome  
165 sequencing, we found that T-ALL samples had near-diploid genomes, with only a few  
166 copy number alterations: a chromosome 15 trisomy (case no. 6), a chromosome 10  
167 trisomy (case no. 33) (Supplementary Figure 8A), and loss of the *Cdkn2a* locus  
168 (chromosome 4) in three cases (nos. 2, 22 and 40) (Supplementary Figure 8B). In  
169 contrast, no consistent copy number alterations were found in 2 cases of mixed T and  
170 B cell disease (Supplementary Figure 8A). Deletions of the *Tcra/d*, *Tcrb* and *Tcrq* loci  
171 were also found in Marilyn T-ALL (Supplementary Figure 8C), indicating that these loci  
172 underwent genetic rearrangements and that leukemia arose from post- $\beta$ -selection  
173 thymocytes with rearranged TCR loci. As expected from their T lineage origin, T-ALL  
174 cases did not exhibit consistent copy number alterations in the immunoglobulin *Ighm* or  
175 *Igk* loci (Supplementary Figure 8C). The detection of clonal copy number genetic  
176 alterations in Marilyn T-ALL bulk populations further underscores their malignant nature.  
177 Given the high frequency of *NOTCH1*-activating mutations and *CDKN2A* inactivation in  
178 human T-ALL,<sup>5</sup> our findings show that the Marilyn transgenic HY-TCR T-ALL  
179 recapitulates key cellular and molecular features of the human disease.

180

181 **HY-TCR-induced T-ALL is not dependent on *Rag2* recombinase expression**

182 Since several diseased Marilyn females developed B cell lymphoproliferation, we  
183 generated Marilyn mice with *Rag2* constitutive knockout to block B cell development,  
184 while maintaining HY-TCR-dependent T-cell development. This approach  
185 simultaneously assessed whether Rag-mediated gene recombination plays a role in  
186 HY-TCR-induced T cell leukemogenesis. Marilyn HY-TCR cohorts with (Marilyn;*Rag2*<sup>+/-</sup>)  
187 or without *Rag2* protein (Marilyn;*Rag2*<sup>-/-</sup>) were generated in another animal facility  
188 (i3S/Porto). Surprisingly, most Marilyn;*Rag2*<sup>+/-</sup> female mice (78%) did not develop  
189 disease, with the exception of two mice with splenomegaly at nearly 18 months of age,  
190 which was composed of B and myeloid cells (Figure 3A and not shown). Although half  
191 of Marilyn;*Rag2*<sup>-/-</sup> males developed hematological splenic disease after 1 year of age (4  
192 cases of myeloid proliferation and 1 case of *Notch1*-mutated TCR-V $\beta$  6<sup>+</sup> CD4<sup>-</sup>CD8<sup>-</sup>  
193 splenic lymphoma), nearly all Marilyn;*Rag2*<sup>-/-</sup> females developed lymphoma with much

194 earlier onset than males (median survival of 46 and 70 weeks, respectively; Figure 3A).  
195 All diseased Marilyn;*Rag2*<sup>-/-</sup> females presented thymic lymphoma, of variable size,  
196 frequently accompanied by enlarged spleen, LNs, liver and kidneys (Figure 3B;  
197 Supplementary Figure 9A). Leukemias from Marilyn;*Rag2*<sup>-/-</sup> females were mostly  
198 composed of CD4<sup>+/low</sup>CD8<sup>+/low</sup> immature T cells expressing TCR-Vβ6, high levels of  
199 CD24, CD44 negativity and variable expression of CD25 and CD5 (Figure 3C, panel i,  
200 and Supplementary Table 2). A similar immunophenotype was detected across  
201 different affected organs, suggesting that diseased cells disseminated from the thymus  
202 to other organs (Figure 3C, panel ii). The pathological and immunophenotypic features,  
203 together with the observed 60% frequency of *Notch1* exon 34 frameshift mutations and  
204 ability to reinitiate disease in syngeneic recipients (Supplementary Table 2), indicate  
205 that Marilyn;*Rag2*<sup>-/-</sup> females developed T-ALL. To assess the degree of leukemic cell  
206 infiltration in different Marilyn;*Rag2*<sup>-/-</sup> organs, we performed histological analysis.  
207 Lymphoblasts were conspicuous in the thymus and spleen, and infiltrated with variable  
208 extent, the liver, kidneys, lungs and bone marrow (Supplementary Figure 9B).  
209 Interestingly, immunohistochemical analyses of thymus histological sections showed  
210 that while Marilyn T-ALL cells were highly proliferative, with conspicuous Ki67 staining,  
211 they maintained a high level of apoptosis, as gauged by cleaved caspase 3 staining  
212 (Figure 3D). In sum, these data confirm that Marilyn HY-TCR tonic signaling drives T-  
213 ALL and demonstrated that Rag recombinase-mediated DNA rearrangements are not  
214 implicated.

215

### 216 **Hematological disease in HY-TCR transgenic females is associated with** 217 **microbial status**

218 Marilyn females in the UAlg/Faro animal facility had higher incidence of hematological  
219 disease than the Marilyn;*Rag2*<sup>+/-</sup> females in the i3S/Porto facility. Since opportunistic  
220 microorganisms were detected in the UAlg but not the i3S facility (see Materials and  
221 methods), we posit that an environmental input present only at the UAlg facility  
222 increased susceptibility for lymphoid disease. Considering that bacteria are frequently  
223 present in tumors, and can be detected by immunohistochemical methods,<sup>25</sup> we  
224 probed lymphomas obtained in both facilities for the presence of bacterial-derived  
225 lipopolysaccharide (LPS). Indeed, Marilyn lymphomas derived from the UAlg facility  
226 displayed more conspicuous LPS immunostaining than Marilyn;*Rag2*<sup>-/-</sup> lymphomas  
227 derived from the i3S facility (Supplementary Figure 10A). Of note, the pattern of LPS  
228 staining in Marilyn splenic lymphomas overlapped with B220<sup>+</sup> B cell areas  
229 (Supplementary Figure 10B). These data suggest that higher bacterial exposure could  
230 have promoted hematological diseases in Marilyn females.



231

232 **The transgenic HY-TCR is functional in Marilyn T-ALL cells and its stimulation**  
233 **delays leukemogenesis**

234 Given that antigenic stimulation prevented spontaneous T-ALL development in male  
235 HY-TCR mice, we set out to determine the response of female HY-TCR leukemic cells  
236 to TCR stimulation. Marilyn T-ALL cells readily increased CD69 and CD5 expression  
237 and enlarged in size when stimulated *in vitro* with plate-bound CD3 antibody, which  
238 directly activates the TCR signaling complex, or phorbol 12-myristate-13-acetate (PMA)  
239 and ionomycin, triggering downstream activation of protein kinase C and intracellular  
240 calcium pathways (Supplementary Figure 11). Previous research demonstrated that  
241 agonist TCR stimulation can induce T-ALL apoptosis *in vitro*.<sup>19</sup> However, Marilyn  
242 leukemic cells underwent extensive apoptosis *in vitro*, impeding determination if TCR  
243 stimulation induced cell death. To assess the impact of TCR stimulation *in vivo*, Marilyn  
244 T-ALL cells were injected in syngeneic male and female mice and disease progression  
245 followed by peripheral blood collection. Marilyn T-ALL cells were found in the blood of  
246 females, but not males, as early as 30 days post-injection (Figure 4A). Most female  
247 recipients rapidly developed fatal T-ALL, while male recipients often failed to develop  
248 leukemia and therefore survived longer (Figure 4B). In addition, females infused with  
249 Marilyn T-ALL presented significantly larger spleen and kidneys (Figure 4C), and more  
250 extensive BM leukemia infiltration (Figure 4D), than male recipients euthanized  
251 simultaneously. Furthermore, male spleens showed higher levels of cleaved caspase 3  
252 immunostaining than female spleens (Figure 4E), indicating that delayed  
253 leukemogenesis in males was caused by apoptosis induction.

254 To address whether the leukemia-delaying effect of agonist-induced TCR  
255 stimulation in Marilyn T-ALL cells was dependent on MHC class II presentation, Marilyn  
256 T-ALL cells were infused in immunodeficient syngeneic and allogenic males and  
257 females. In contrast to the delayed T-ALL development in syngeneic males, as  
258 compared to female counterparts (Figure 4F, left panel), no significant difference  
259 between allogeneic males and females was observed (Figure 4F, right panel). These  
260 findings indicate that the T-ALL-suppressive effect of the male antigen was dependent  
261 on restricted MHC class II molecules. To confirm that delayed Marilyn leukemogenesis  
262 in male mice was due to male antigen presentation, we next treated syngeneic  
263 immunodeficient females infused with Marilyn T-ALL with the DBY cognate peptide.  
264 Indeed, DBY administration significantly delayed T-ALL development in females  
265 (Figure 4F). Overall, these data indicate that strong agonistic HY-TCR signaling  
266 suppresses leukemogenesis.

267

## 268 Discussion

269 In this report, we addressed the functional role of TCR signaling intensity in mouse T-  
270 ALL. We show that transgenic Marilyn HY-TCR tonic signaling not only had a  
271 synergistic effect with the ETV6::JAK2 fusion kinase, but also was sufficient to induce  
272 T-ALL on its own. Furthermore, our data show that the TCR expressed in Marilyn T-  
273 ALL cells responded to agonist stimuli, inducing apoptosis and leading to  
274 leukemogenesis suppression. Thus, these results support the notion that tonic TCR  
275 signaling can be leukemogenic, and strong signaling emanating from the same TCR is  
276 anti-leukemic.

277 Tonic signaling is generated by relatively weak TCR interactions with self-pMHC  
278 ligands and is important for controlling survival of naive T cells and allow their  
279 responsiveness to foreign antigens.<sup>26</sup> Thymocytes expressing transgenic TCRs against  
280 foreign antigens (such as the male antigen for females) are subjected to self-pMHC-  
281 mediated tonic signaling during their maturation, namely at the positive selection stage.  
282 The notion that TCR signaling can be leukemogenic has been earlier described, and  
283 transgenic TCR mouse strains other than the Marilyn strain, were shown to lead to  
284 spontaneous T-ALL development with variable latency and penetrance.<sup>27-30</sup> It is thus  
285 likely that tonic signaling originates pro-survival or pro-proliferative genetic programs  
286 that can cooperate with stochastic oncogenic genetic alterations, such as *Notch1*-  
287 activating mutations and *Cdkn2a* deletions. *Cdkn2a* inactivation in particular was  
288 reported to facilitate the malignant transformation of immature T cells,<sup>31,32</sup> so it is  
289 possible that loss of *Cdkn2a* function may cooperate with TCR tonic signaling in DN  
290 thymocytes.

291 The finding that tonic TCR signaling can promote malignant transformation finds  
292 parallels in other systems. In fact, tonic B cell receptor signaling, defined as antigen-  
293 independent cell-autonomous signaling, has been shown to drive B cell  
294 lymphomagenesis<sup>33-35</sup> and to be therapeutically targetable.<sup>36</sup> By the same token, tonic  
295 TCR signaling could be a targetable mechanism in human T-ALL, as suggested by the  
296 frequent activation of Lck kinase (a mediator of TCR signaling) in T-ALL and by the  
297 therapeutic potential of Lck inhibitors.<sup>6-9</sup> Lck kinase activation in T-ALL was attributed  
298 to constitutive pre-TCR signaling found in a subset of patients.<sup>6</sup> Since TCR and CD3  
299 proteins are also frequently expressed in T-ALL,<sup>4</sup> further studies are warranted to  
300 determine the role of TCR signaling in human T-ALL pathogenesis.

301 Although Rag recombinase-mediated mutagenic events can contribute to  
302 leukemia development,<sup>37</sup> that was not the case for Marilyn T-ALL. In fact, T-ALL  
303 developed with higher penetrance and much faster in Marilyn;*Rag2*<sup>-/-</sup> females than in  
304 Marilyn;*Rag2*<sup>+/-</sup> females generated in the same animal facility. Since Rag2 deficiency

305 arrests thymocyte development at the DN3 stage, these results suggest that ectopic  
306 TCR expression at the immature DN3 stage in the absence of more mature thymocytes  
307 has increased leukemogenic potential, in line with the finding that early expression of  
308 mature TCR in DN thymocytes promotes T-ALL development.<sup>30</sup>

309 Rag2-sufficient, Marilyn mouse cohorts housed in different animal facilities led  
310 to unexpected different rates of T-ALL incidence. Indeed, Marilyn T-ALL frequency was  
311 much higher in females housed at the UAlg/Faro facility than females housed at the  
312 i3S/Porto facility. Since several microorganisms (*Helicobacter* spp., *Pasteurella*  
313 *pneumotropica* and murine norovirus) were detected in the UAlg facility, but not in the  
314 i3S facility, increased exposure to pathogenic microbiota could have promoted a  
315 microenvironment favorable for transgenic TCR-induced leukemogenesis. This notion  
316 is supported by the finding of higher levels of LPS staining in lymphomas from UAlg  
317 facility mice than in lymphomas from i3S facility mice. Early research revealed that B-  
318 ALL in *Pax5* heterozygous mice was initiated only upon exposure to common  
319 pathogens.<sup>38</sup> Future studies should, therefore, determine whether the presence of  
320 microorganisms promotes TCR-induced leukemogenesis and whether TCR interactions  
321 with MHC molecules presenting non-cognate foreign peptides generate pro-  
322 leukemogenic basal TCR signaling.

323 Although T-ALL in Marilyn females developed in the presence of self-pMHC, we  
324 found that MHC-dependent TCR signaling was not required for its maintenance.  
325 Indeed, secondary leukemia development was not affected by lack of MHC-bound self-  
326 peptides in recipient allogenic mice. These results contrast with the finding that  
327 continuous self-pMHC-mediated TCR signaling was necessary for lymphoma cell  
328 growth in a TCR-expressing reprogrammed T cell model.<sup>39</sup> Of note, expression of a  
329 transgenic TCR recognizing a peptide from the murine survivin protein was also shown  
330 to result in increased TCR signaling and to induce T-ALL.<sup>29</sup> In this case, the specific  
331 (self) antigen, survivin, was expressed constitutively, which contrasts with the absence  
332 of the HY-TCR cognate peptide (DBY) in Marilyn females. Our data together with  
333 previous reports demonstrate that the TCR signaling complex promotes T-ALL, and  
334 that this ability very much depends on the TCR affinity to antigen.

335 Finally, we showed that Marilyn T-ALL cells had a functional TCR and that *in*  
336 *vivo* TCR stimulation of transplanted female Marilyn T-ALL cells was associated with  
337 apoptosis and impaired Marilyn T-ALL leukemogenesis. These observations  
338 corroborate previous reports showing that mouse or human T-ALL underwent  
339 apoptosis upon activation of the TCR/CD3 signaling complex.<sup>19,28,40</sup> These findings  
340 suggest that, similarly to thymocytes undergoing thymic selection, TCR activation with  
341 low-affinity or high-affinity antigens will stimulate differentially the TCR signaling

342 pathway and result in cell survival or death.<sup>41</sup> Future research should determine the  
343 TCR signaling regulators that dictate if a particular antigenic stimulus promotes or  
344 antagonizes T-ALL.

## 345 **Methods**

### 346 **Mice**

347 HY-TCR Marilyn transgenic mice (B6.Cg-Tg(TcraH-Y,TcrbH-Y)1Pas), on a CD45.1  
348 background, were obtained from Jocelyne Demengeot (IGC, Oeiras). Marilyn mice  
349 were bred with E $\mu$ SR $\alpha$ -ETV6::JAK2 (B6.Cg-Tg(Emu-ETV6/JAK2)71Ghy) transgenic  
350 mice<sup>13</sup>, or *Rag2* (B6.129S6-*Rag2*<sup>tm1Fwa</sup>) knockout mice. The ETV6::JAK2 transgene  
351 was kept in hemizyosity. *Foxn1*<sup>nu/nu</sup> (Nude) C57BL/6 and CBA mice were bred at the  
352 i3S facility. Mice were maintained at the UAlg/Faro and i3S/Porto barrier animal  
353 facilities, under 12 h light/dark cycles and with food and water *ad libitum*. HY-TCR  
354 Marilyn mice and ETV6::JAK2;Marilyn double transgenic were bred at the UALg animal  
355 facility, while the Marilyn;*Rag2*<sup>+/-</sup> and Marilyn;*Rag2*<sup>-/-</sup> were bred at the i3S animal facility.  
356 Microorganism screening detected opportunistic pathogens (*Helicobacter* spp.,  
357 *Pasteurella pneumotropica* and murine norovirus) in the UAlg, but not i3S,  
358 experimental rooms. All experimental procedures were approved by the i3S and  
359 CBMR/UAlg ethics committees and Portuguese authorities (*Direção-Geral de*  
360 *Agricultura e Veterinária*) and followed recommendations from the European  
361 Commission (Directive 2010/63/UE) and the local Portuguese authorities (*Decreto-Lei*  
362 n°113/2013). Both female and male mice were used for all experiments. Mice were  
363 monitored for signs of disease (e.g. dyspnea, lethargy, enlarged lymph nodes and  
364 enlarged abdomen) and killed by CO<sub>2</sub> inhalation when reaching predefined  
365 experimental endpoints. Mice of different genotypes from the same litter were kept  
366 together in the same cages and monitoring for signs of disease was done blindly. Adult  
367 mice that were euthanized without leukemia were censored in Kaplan-Meier survival  
368 curves.

369

### 370 **Mice genotyping**

371 The following primers were used for genotyping. HY-TCR Marilyn transgene: 5'-  
372 CGAGAGGAACCTGGGAGCTGT-3' and 5'-TGCTGTCTGTACCACCAGAAATAC-3';  
373 *Rag2*: 5'-TGTCCCTGCAGATGGTAACA-3', 5'-CCTTTGTATGAGCAAGTAGC-3', 5'-  
374 CTATTCGGCTATGACTGGG-3' and 5'-AAGGCGATAGAAGGCGATG-3'; *Cdkn2a*: 5'-  
375 GTGATCCCTCTACTTTTTCTTCTGACTT-3', 5'-CGGAACGCAAATATCGCAC-3' and  
376 5'-GAGACTAGTGAGACGTGCTACTTCCA-3'.

377

### 378 **In vivo experiments**

379 For mouse leukemia transplantation assays, 0.5-2 x 10<sup>6</sup> leukemic cells collected from  
380 diseased female Marilyn mice were intravenously injected in the tail vein of recipient 8-  
381 12-week-old C57BL/6, C57BL/6 Nude or CBA Nude mice of the indicated sex, and

382 regularly monitored through peripheral blood detection of leukemic cells  
383 (CD45.1<sup>+</sup>CD45.2<sup>+</sup>TCR-V $\beta$ 6<sup>+</sup>). Female *Rag2*<sup>-/-</sup> mice infused with Marilyn T-ALL cells  
384 were treated intraperitoneally once a week for two weeks with 0.01 mg of DBY peptide  
385 (NAGFNSNRANSSRSS; cat. no. AS-61046; Eurogentec).

386

### 387 **Flow cytometry**

388 Single-cell suspensions were prepared from lymphoid organs using cell strainers,  
389 washed with FACS buffer (phosphate-buffered saline (PBS) with 3% fetal bovine  
390 serum (FBS) and 10 mM NaN<sub>3</sub>), and incubated for 30-45 min with fluorochrome-  
391 labeled antibodies in FACS buffer. The following Biolegend antibodies were used:  
392 CD25-fluoresceine isothiocyanate (FITC) (clone PC61), TCR  $\beta$  -phycoerithrin (PE)  
393 (clone H57-597), CD44-PE/Cyanine5 (clone IM7), CD90.2-PE-Cyanine7 (clone 30-  
394 H12), CD24-allophycocyanin (APC) (clone M1/69), CD4-APC/Cyanine7 (clone GK1.5),  
395 CD8  $\alpha$  -Pacific Blue (clone 53-6.7), Gr1-PE (clone RB6-8C5), CD127-PE/Cyanine5  
396 (clone A7R34), B220-APC/Cyanine7 (clone RA3-6B2), CD24-Pacific Blue (clone  
397 M1/69), CD90.2-FITC (clone 30-H12), TCR-V $\beta$ 6-PE (clone RR4-7), TCR-V $\beta$ 5.1, 5.2-PE  
398 (clone MR9-4), CD5-APC (clone 53-7.3), CD69-FITC (clone H1.2F3), CD62L-APC  
399 (clone MEL-14), CD45.1-APC (clone A20) and CD45.2-Peridinin Chlorophyll Protein  
400 (PerCP)-Cyanine5.5 (clone 104). Immunostained cells were washed twice with FACS  
401 buffer and incubated in PBS with 10 mM NaN<sub>3</sub>. Cell viability was determined using the  
402 Zombie Aqua Fixable Viability Kit (Invitrogen). Samples were acquired using BD FACS  
403 Calibur, CANTO II or Accuri C6 and analyzed using FlowJo software.

404

### 405 ***Ex-vivo* T-ALL cell culture**

406 Marilyn T-ALL cells were cultured *ex-vivo* for 16 h in RPMI medium supplemented with  
407 10% FBS, 1% penicillin-streptomycin and 50  $\mu$ M of 2-mercaptoethanol, all from Gibco.  
408 For *ex vivo* stimulation of Marilyn T-ALL cells, plates were coated with 10  $\mu$ g/ml anti-  
409 CD3 (145-2C11, Biolegend) for 2 h at 37°C, and then plates were washed with PBS.  
410 Ten ng/ml of PMA and 250 ng/ml Ionomycin (both from Sigma-Aldrich) treatments were  
411 performed for 18 hours.

412

### 413 ***Notch1* mutation detection**

414 Genomic DNA from mouse leukemia samples was isolated using the GeneJET  
415 Genomic DNA purification kit (Thermo Fisher Scientific), following the manufacturer's  
416 instructions. DNA was used for PCR amplification of two segments of *Notch1* exon 34:  
417 primer pair 5'-GCTCCCTCATGTACCTCCTG-3' and 5'-TAGTGGCCCCATCATGCTAT-

418 3', generating a predicted amplicon of 904 bp, and primer pair 5'-  
419 ATAGCATGATGGGGCCACTA-3' and 5'-CTTCACCCTGACCAGGAAAA-3',  
420 generating a predicted amplicon of 893 bp. PCR products were Sanger sequenced  
421 using the same primers at i3S Genomics (Porto, Portugal) or CCMAR *Serviços de*  
422 *Biologia Molecular* (Faro, Portugal).

423

#### 424 **Low-coverage whole genome sequencing**

425 Genomic DNA was used for copy number analysis performed as described previously<sup>42</sup>  
426 using a HiSeq 4000 (Illumina) sequencer in a single-read 50-cycle run mode. For copy  
427 number analysis, sequencing data was aligned with the mouse genome (mm10) as  
428 reference and further analyzed using QDNAseq (RRID:SCR\_003174) package  
429 (version 1.12) in R software. A bin size of 15 kb was used.

430

#### 431 **Histology and immunohistochemistry**

432 For histological and immunohistochemistry analysis, formalin-fixed paraffin-embedded  
433 tissues were sectioned with 4  $\mu$  m thickness. Hematoxylin and eosin staining was  
434 performed using standard procedures. For immunohistochemistry, heat-mediated  
435 antigen retrieval was performed for 35-40 min with citrate-based antigen retrieving  
436 solution (cat. no. H-3300, Vector Laboratories), for cleaved-caspase 3, Ki67 and LPS  
437 immunodetection, or 10  $\mu$ M EDTA, pH 8.0, and 0.05% Tween 20 in PBS, for B220 or  
438 CD3 immunodetection. Endogenous peroxidase was inactivated with 3% H<sub>2</sub>O<sub>2</sub> in  
439 methanol, and nonspecific antibody binding was blocked using Ultravision Protein-  
440 block (Thermo Fisher Scientific). Sections were incubated overnight with rat anti-B220  
441 (1:200, clone RA3-6B2, Biolegend), anti-CD3 (1:200, ab5690, Abcam), anti-cleaved-  
442 caspase 3 (1:200, 9661, Cell Signaling), Ki67 (1:500, ab15580, Abcam) or LPS (1:100,  
443 WN1 222-5, Hycult Biotech) at 4 °C. For B220 detection, slides were incubated  
444 sequentially with avidin/biotin blocking system (Biolegend), goat anti-rabbit secondary  
445 antibody (Biovision), and streptavidin-horseradish peroxidase (HRP) (Enzo Biochem).  
446 For CD3, Ki67 and LPS detection, HRP-conjugated rabbit/mouse secondary antibody  
447 (Agilent) was used. 3,3'-Diaminobenzidine chromogen (Agilent) was used as detection  
448 reagent. For quantification of percentage of cleaved caspase 3-positive cells, five  
449 images were taken from different areas of each tissue section.

450

#### 451 **Statistics**

452 Statistical analysis was performed with GraphPad Prism 6.0 software  
453 (RRID:SCR\_002798). Log-rank test was used to compare survival of different groups.  
454 Unpaired student's t-test was used for comparisons between two groups. Welch's

455 correction was used when variances were different. Mann-Whitney test was used to  
456 compare white blood cell (WBC) count. Detection of CD45.1<sup>+</sup> T-ALL cells in the  
457 peripheral blood of males and females was compared using two-way ANOVA. Sample  
458 numbers are indicated in figure legends.  $P < 0.05$  was considered statistically significant.

459

#### 460 **Data Sharing Statement**

461 The data that support the findings of this study are available from the corresponding  
462 author, upon reasonable request. Raw unaligned sequencing reads (fastq-format) that  
463 support the findings of this study have been deposited in the SRA.

464

#### 465 **Acknowledgments**

466 We thank Jocelyne Demengeot (IGC, Oeiras) and Nuno L. Alves (i3S, Porto) for  
467 providing Marylin transgenic mice. We thank members of i3S Intercellular  
468 Communication and Cancer group for fruitful discussions about this work. The authors  
469 acknowledge the support the Animal Facility, Translational Cytometry and Histology,  
470 Electron Microscopy (member of the Portuguese Platform of Bioimaging; PPBI-POCI-  
471 01-0145-FEDER-022122) and Genomics i3S Scientific Platforms. This work was  
472 supported by a fellowship (FAZ Ciencia prize) from Fundação AstraZeneca (Lisbon,  
473 Portugal). This work was supported by European Regional Development Fund (ERDF),  
474 through COMPETE 2020 - Operational Program for Competitiveness and  
475 Internationalisation, Portugal2020, and *Fundação para a Ciência e a Tecnologia* (FCT;  
476 POCI-01-0145-FEDER-007274; PTDC/MED-ONC/32592/2017), and by ERDF, through  
477 the Norte Portugal Regional Program (NORTE2020), Portugal2020 (NORTE-01-0145-  
478 FEDER-000029) and HEALTH-UNORTE (NORTE-01-0145-000039). T.A.C. was  
479 recipient of FCT (PD/BD/114129/2015) and *Liga Portuguesa Contra o Cancro – Núcleo*  
480 *Regional do Norte* fellowships. J.L.P. (SFRH/BD/147979/2019) and M.B.  
481 (2021.06024.BD) were recipients of FCT fellowships.

482

483 **Contribution:** T.A.C. designed, performed and analyzed experiments, made the  
484 figures and wrote the paper; I.P.-L., J.L.P., and M.B. performed experiments; N.R.S.  
485 designed the study, performed experiments, made the figures and wrote the paper.

486

487 **Conflict-of-interest disclosures:** No competing financial interests to declare.

488

489 **Correspondence:** Nuno R. dos Santos, i3S - Instituto de Investigação e Inovação em  
490 Saúde, Universidade do Porto, Rua Alfredo Allen, 208, 4200-135 Porto, Portugal; e-  
491 mail: nunos@i3s.up.pt



492

493 **References**

- 494 1. Shah, D. K. & Zúñiga-Pflücker, J. C. An Overview of the Intrathymic Intricacies  
495 of T Cell Development. *The Journal of Immunology* **192**, 4017–4023 (2014).
- 496 2. Liu, X. *et al.* Notch-induced endoplasmic reticulum-associated degradation  
497 governs mouse thymocyte  $\beta$ -selection. *Elife* **10**, (2021).
- 498 3. Klein, L., Kyewski, B., Allen, P. M. & Hogquist, K. A. Positive and negative  
499 selection of the T cell repertoire: what thymocytes see (and don't see). *Nat Rev*  
500 *Immunol* **14**, 377–391 (2014).
- 501 4. Asnafi, V. *et al.* Analysis of TCR, pT alpha, and RAG-1 in T-acute lymphoblastic  
502 leukemias improves understanding of early human T-lymphoid lineage  
503 commitment. *Blood* **101**, 2693–2703 (2003).
- 504 5. Girardi, T., Vicente, C., Cools, J. & De Keersmaecker, K. The genetics and  
505 molecular biology of T-ALL. *Blood* **129**, 1113–1123 (2017).
- 506 6. Gocho, Y. *et al.* Network-based systems pharmacology reveals heterogeneity in  
507 LCK and BCL2 signaling and therapeutic sensitivity of T-cell acute  
508 lymphoblastic leukemia. *Nat Cancer* **2**, 284–299 (2021).
- 509 7. Laukkanen, S. *et al.* Therapeutic targeting of LCK tyrosine kinase and mTOR  
510 signaling in T-cell acute lymphoblastic leukemia. *Blood* **140**, 1891–1906 (2022).
- 511 8. Serafin, V. *et al.* Glucocorticoid resistance is reverted by LCK inhibition in  
512 pediatric T-cell acute lymphoblastic leukemia. *Blood* **130**, 2750–2761 (2017).
- 513 9. Buffière, A. *et al.* Saracatinib impairs maintenance of human T-ALL by targeting  
514 the LCK tyrosine kinase in cells displaying high level of lipid rafts. *Leukemia* **32**,  
515 2062–2065 (2018).
- 516 10. Campese, A. F. *et al.* Notch1-dependent lymphomagenesis is assisted by but  
517 does not essentially require pre-TCR signaling. *Blood* **108**, 305–310 (2006).
- 518 11. Bellavia, D. *et al.* Combined expression of pT $\alpha$  and Notch3 in T cell leukemia  
519 identifies the requirement of preTCR for leukemogenesis. *Proceedings of the*  
520 *National Academy of Sciences* **99**, 3788–3793 (2002).
- 521 12. Smith, D. P., Bath, M. L., Harris, A. W. & Cory, S. T-cell lymphomas mask  
522 slower developing B-lymphoid and myeloid tumours in transgenic mice with  
523 broad haemopoietic expression of MYC. *Oncogene* **24**, 3544–3553 (2005).
- 524 13. dos Santos, N. R. *et al.* Pre-TCR expression cooperates with TEL-JAK2 to  
525 transform immature thymocytes and induce T-cell leukemia. *Blood* **109**, 3972–  
526 3981 (2007).
- 527 14. Tremblay, M. *et al.* Modeling T-cell acute lymphoblastic leukemia induced by  
528 the SCL and LMO1 oncogenes. *Genes Dev* **24**, 1093–1105 (2010).

- 529 15. Liao, M.-J. *et al.* No Requirement for V(D)J Recombination in p53-Deficient  
530 Thymic Lymphoma. *Mol Cell Biol* **18**, 3495–3501 (1998).
- 531 16. Kelly, J. A. *et al.* Stat5 Synergizes with T Cell Receptor/Antigen Stimulation in  
532 the Development of Lymphoblastic Lymphoma. *Journal of Experimental*  
533 *Medicine* **198**, 79–89 (2003).
- 534 17. Tsatsanis, C. *et al.* Tpl2 and ERK transduce antiproliferative T cell receptor  
535 signals and inhibit transformation of chronically stimulated T cells. *Proceedings*  
536 *of the National Academy of Sciences* **105**, 2987–2992 (2008).
- 537 18. Gon, S. *et al.* Fit  $\alpha\beta$  T-cell receptor suppresses leukemogenesis of Pten-  
538 deficient thymocytes. *Haematologica* **103**, 999–1007 (2018).
- 539 19. Trinquand, A. *et al.* Triggering the TCR Developmental Checkpoint Activates a  
540 Therapeutically Targetable Tumor Suppressive Pathway in T-cell Leukemia.  
541 *Cancer Discov* **6**, 972–85 (2016).
- 542 20. Lantz, O., Grandjean, I., Matzinger, P. & di Santo, J. P.  $\gamma$  chain required for  
543 naïve CD4+ T cell survival but not for antigen proliferation. *Nat Immunol* **1**, 54–  
544 58 (2000).
- 545 21. Bendelac, A., Matzinger, P., Seder, R. A., Paul, W. E. & Schwartz, R. H.  
546 Activation events during thymic selection. *J Exp Med* **175**, 731–42 (1992).
- 547 22. Azzam, H. S. *et al.* CD5 expression is developmentally regulated by T cell  
548 receptor (TCR) signals and TCR avidity. *J Exp Med* **188**, 2301–11 (1998).
- 549 23. O’Neil, J. *et al.* Activating Notch1 mutations in mouse models of T-ALL. *Blood*  
550 **107**, 781–785 (2006).
- 551 24. Lin, Y.-W., Nichols, R. A., Letterio, J. J. & Aplan, P. D. Notch1 mutations are  
552 important for leukemic transformation in murine models of precursor-T  
553 leukemia/lymphoma. *Blood* **107**, 2540–2543 (2006).
- 554 25. Nejman, D. *et al.* The human tumor microbiome is composed of tumor type-  
555 specific intracellular bacteria. *Science (1979)* **368**, 973–980 (2020).
- 556 26. Cho, J.-H. & Sprent, J. TCR tuning of T cell subsets. *Immunol Rev* **283**, 129–  
557 137 (2018).
- 558 27. Brabb, T., Rubicz, R., Mannikko, V. & Goverman, J. Separately expressed T  
559 cell receptor  $\alpha$  and  $\beta$  chain transgenes exert opposite effects on T cell  
560 differentiation and neoplastic transformation. *Eur J Immunol* **27**, 3039–3048  
561 (1997).
- 562 28. Strzadala, L., Miazek, A., Matuszyk, J. & Kisielow, P. Role of thymic selection in  
563 the development of thymic lymphomas in TCR transgenic mice. *Int Immunol* **9**,  
564 127–38 (1997).

- 565 29. Cui, Y. *et al.* Thymic expression of a T-cell receptor targeting a tumor-  
566 associated antigen coexpressed in the thymus induces T-ALL. *Blood* **125**,  
567 2958–2967 (2015).
- 568 30. Laffey, K. G. *et al.* Early expression of mature  $\alpha\beta$  TCR in CD4 – CD8 – T cell  
569 progenitors enables MHC to drive development of T-ALL bearing NOTCH  
570 mutations. *Proceedings of the National Academy of Sciences* **119**, (2022).
- 571 31. Volanakis, E. J., Williams, R. T. & Sherr, C. J. Stage-specific Arf tumor  
572 suppression in Notch1-induced T-cell acute lymphoblastic leukemia. *Blood* **114**,  
573 4451–4459 (2009).
- 574 32. Catarino, T. A. *et al.* Cdkn2a inactivation promotes malignant transformation of  
575 mouse immature thymocytes before the  $\beta$ -selection checkpoint. *Exp Hematol*  
576 **116**, 30–36 (2022).
- 577 33. Minden, M. D. *et al.* Chronic lymphocytic leukaemia is driven by antigen-  
578 independent cell-autonomous signalling. *Nature* **489**, 309–312 (2012).
- 579 34. Schmitz, R. *et al.* Burkitt lymphoma pathogenesis and therapeutic targets from  
580 structural and functional genomics. *Nature* **490**, 116–120 (2012).
- 581 35. Havranek, O. *et al.* Tonic B-cell receptor signaling in diffuse large B-cell  
582 lymphoma. *Blood* **130**, 995–1006 (2017).
- 583 36. Szydłowski, M. *et al.* FOXO1 activation is an effector of SYK and AKT inhibition  
584 in tonic BCR signal-dependent diffuse large B-cell lymphomas. *Blood* **127**, 739–  
585 748 (2016).
- 586 37. Bianchi, J. J., Murigneux, V., Bedora-Faure, M., Lescale, C. & Deriano, L.  
587 Breakage-Fusion-Bridge Events Trigger Complex Genome Rearrangements  
588 and Amplifications in Developmentally Arrested T Cell Lymphomas. *Cell Rep*  
589 **27**, 2847-2858.e4 (2019).
- 590 38. Martín-Lorenzo, A. *et al.* Infection Exposure Is a Causal Factor in B-cell  
591 Precursor Acute Lymphoblastic Leukemia as a Result of Pax5 -Inherited  
592 Susceptibility. *Cancer Discov* **5**, 1328–1343 (2015).
- 593 39. Serwold, T. *et al.* T-cell receptor-driven lymphomagenesis in mice derived from  
594 a reprogrammed T cell. *Proceedings of the National Academy of Sciences* **107**,  
595 18939–18943 (2010).
- 596 40. Tran Quang, C. *et al.* Preclinical efficacy of humanized, non-Fc $\gamma$ R-binding anti-  
597 CD3 antibodies in T-cell acute lymphoblastic leukemia. *Blood* **136**, 1298–1302  
598 (2020).
- 599 41. dos Santos, N. R., Ghysdael, J. & Tran Quang, C. The TCR/CD3 complex in  
600 leukemogenesis and as a therapeutic target in T-cell acute lymphoblastic  
601 leukemia. *Adv Biol Regul* **74**, 100638 (2019).

- 602 42. Scheinin, I. *et al.* DNA copy number analysis of fresh and formalin-fixed  
603 specimens by shallow whole-genome sequencing with identification and  
604 exclusion of problematic regions in the genome assembly. *Genome Res* **24**,  
605 2022–32 (2014).  
606

607 **Figure legends**

608

609 **Figure 1. HY-TCR transgene expression drives leukemia development.** (A,B)  
610 Kaplan-Meier leukemia-free survival curves of ETV6::JAK2 (male and female together)  
611 and female ETV6::JAK2;Marilyn transgenic mice (A) and male (M) and female (F)  
612 Marilyn transgenic mice (B). Log-rank test *P* values are shown in graphs. (C) Organ  
613 weights of Marilyn females with leukemia/lymphoma compared to those of 7 month-old  
614 wild-type (WT) females (n=3), or 10-week-old WT males for lymph nodes (n=4). For  
615 Marilyn females n=16, except n=14 for kidneys. (D) White blood cell (WBC) counts of  
616 Marilyn (n=15) and WT (n=3) females. Lower panels show blood smears of  
617 representative WT and diseased Marilyn females. *P* values in (C) were obtained from  
618 unpaired *t* tests with Welch's correction, and in (D) from Mann-Whitney test. Mean and  
619 standard error of the mean (SEM) are shown. (E) Histogram representation of tumor  
620 burden in lymphoid organs (thymus, spleen, and lymph nodes (LNs)) of Marilyn  
621 females with or without thymic lymphoma. Female no. 12 had a mediastinal lymphoid  
622 tumor, while no. 26 had lymphoid tumors on the duodenum wall. Each column  
623 represents a mouse. Wild-type (WT) female mice were used as control.

624

625 **Figure 2. Immunophenotypic analysis of HY-TCR leukemic cells.** Flow cytometry  
626 analysis of thymus-derived leukemic cells from representative Marilyn mice presenting  
627 immature T cell phenotype, based on CD44 negativity and high CD24 expression (nos.  
628 22, 33 and 40), mature T cell phenotype, based on CD44 positivity and CD24  
629 intermediate/low expression (nos. 9 and 29), and mixed B and T cell phenotype, based  
630 on B220 and CD90.2 expression (nos. 25 and 34). In CD44 and CD24 histogram plots,  
631 unstained cells were used as negative control (grey shades). Healthy HY-TCR female  
632 total thymocyte immunostaining is shown as control. TL, thymic lymphoma.

633

634 **Figure 3. Transgenic HY-TCR expression in *Rag2*<sup>-/-</sup> mice drives development of T-  
635 ALL with thymic lymphomas.** (A) Kaplan-Meier leukemia-free survival curve for the  
636 indicated genotypes and number of mice (n). Log-rank test *P* values are indicated. (B)  
637 Histogram representation of lymphoid organ weight (thymus, spleen and lymph nodes  
638 (LNs)) of Marilyn females with leukemia (left graph) and healthy (right graph). Each  
639 column represents a mouse. (C) Flow cytometry immunostaining of cells from the  
640 thymus (i) and indicated organs (ii) of two representative Marilyn;*Rag2*<sup>-/-</sup> leukemic mice  
641 with the indicated surface markers. (D) Immunohistochemical Ki67 and cleaved-

642 caspase 3 staining of representative thymic lymphoma sections from Marilyn;*Rag2*<sup>-/-</sup>  
643 and Marilyn;*Rag2*<sup>+/+</sup> diseased mice. Black scale bars: 500 μm; green scale bar: 200 μm.  
644

645 **Figure 4. HY-TCR T-ALL antigenic stimulation *in vivo* hampers leukemia**  
646 **development.** (A) Percentage of CD45.1<sup>+</sup> T-ALL cells detected by flow cytometry in  
647 the peripheral blood (PB) of male and female C57BL/6 mice infused with female HY-  
648 TCR T-ALL cells. *P* value was obtained with two-way ANOVA. (B) Kaplan-Meier  
649 leukemia-free survival curve for the same mice as in (A), which is representative of two  
650 experiments performed with different primary leukemias. *P* value obtained with log-rank  
651 test. (C) Spleens and kidneys (top panels) and respective organ weights (bottom  
652 panels) for male (n=5) and female (n=6) C57BL/6 mice 21 days after infusion with HY-  
653 TCR T-ALL cells. (D) Percentage of CD45.1<sup>+</sup>CD90.2<sup>+</sup> HY-TCR T-ALL cells present in  
654 the bone marrow of males and females shown in (C). *P* values in (C) and (D) were  
655 obtained from unpaired *t* tests with Welch's correction. (E) Representative sections and  
656 quantification of anti-cleaved caspase 3 immunohistochemistry for spleens from  
657 females and males shown in (C,D; n=3). *P* value from unpaired *t* test. (C-E) Graphs  
658 show mean and SEM. (F) Kaplan-Meier leukemia-free survival curves for syngeneic  
659 C57BL/6 nude or allogeneic CBA nude male and female mice injected with female  
660 Marilyn T-ALL cells. Number of mice and *P* values from log-rank test are indicated. (G)  
661 Kaplan-Meier leukemia-free survival curves for syngeneic *Rag2*<sup>-/-</sup> females infused on  
662 day 0 with female Marilyn T-ALL cells and treated once a week with DBY peptide (0.01  
663 mg; n=5) or Control (n=4). Gray shade represents treatment duration of 2 weeks.

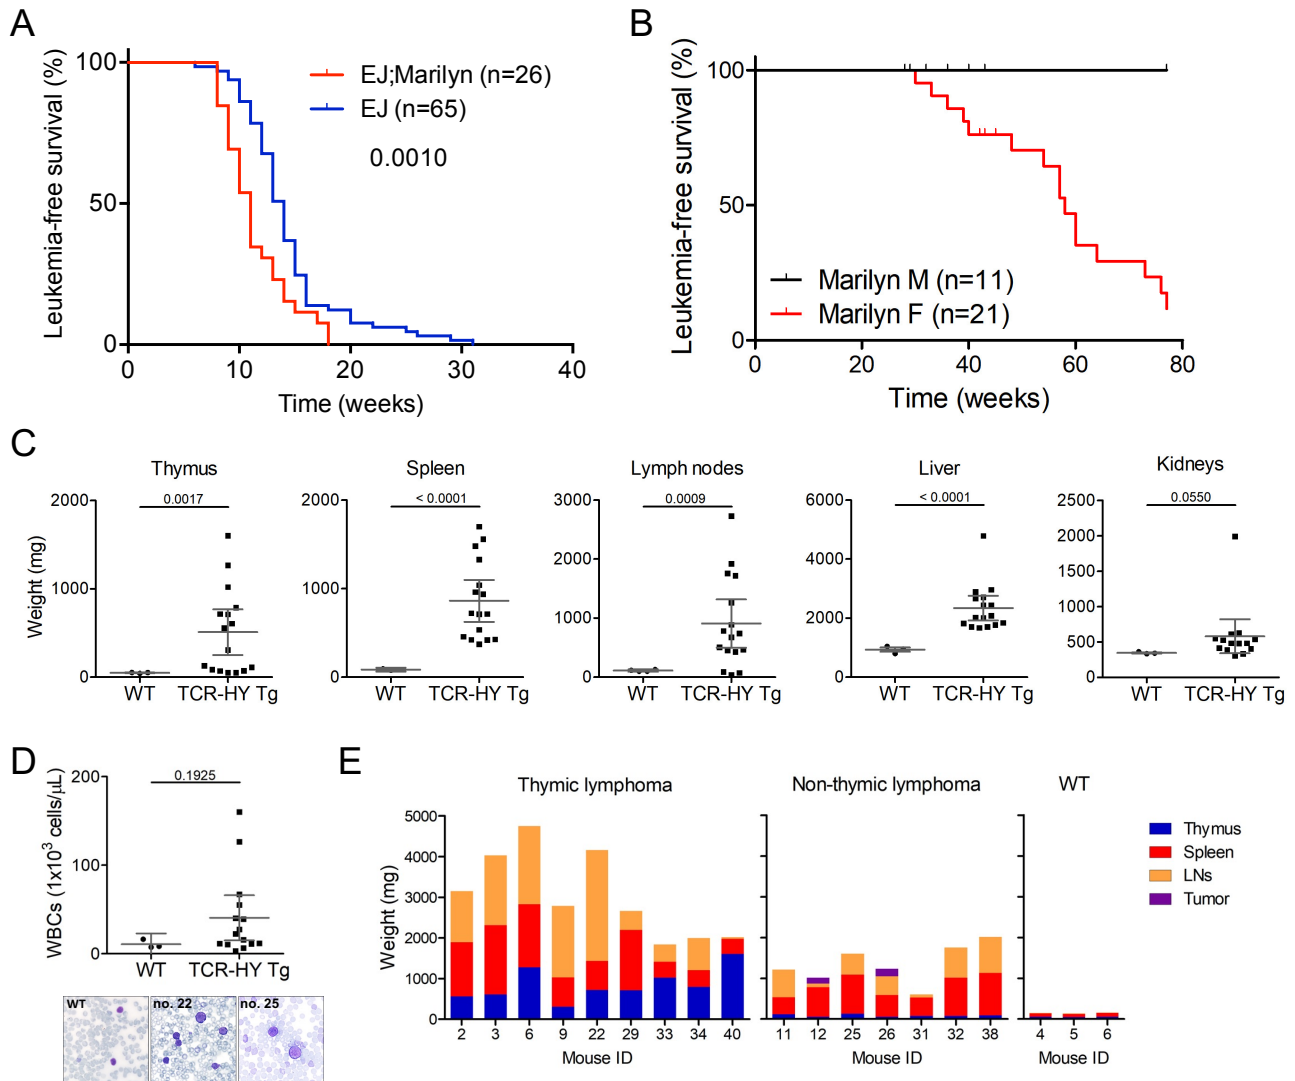

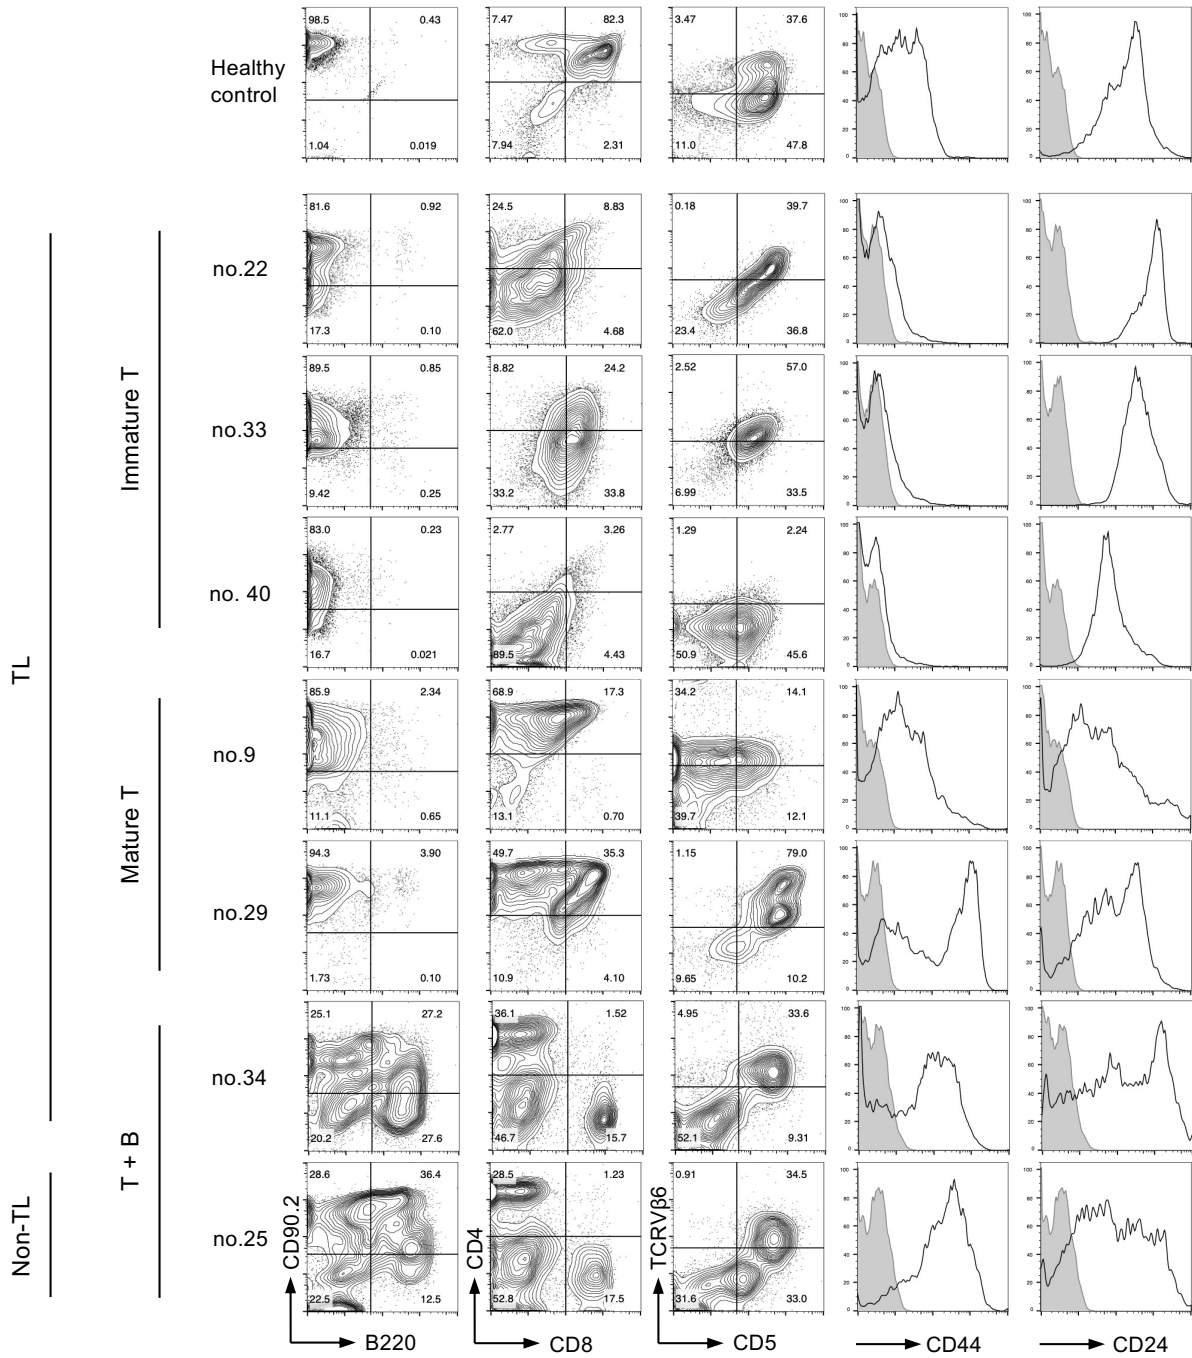



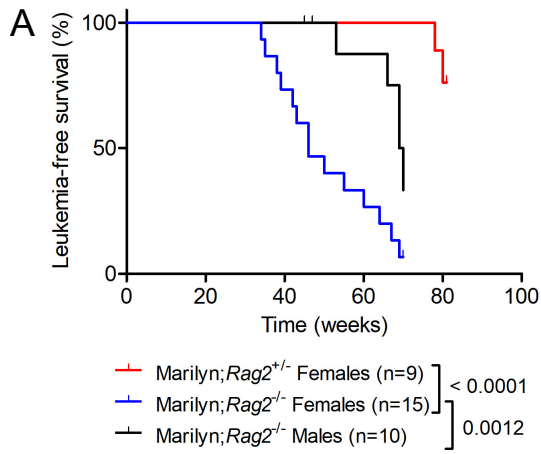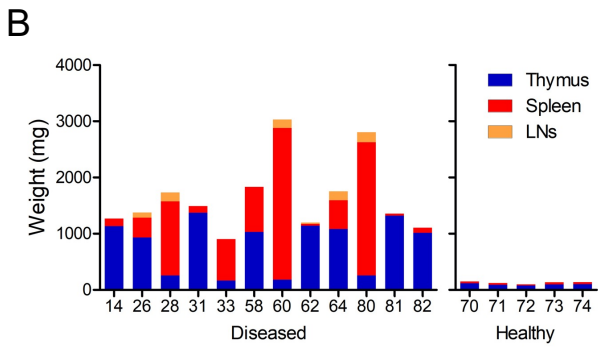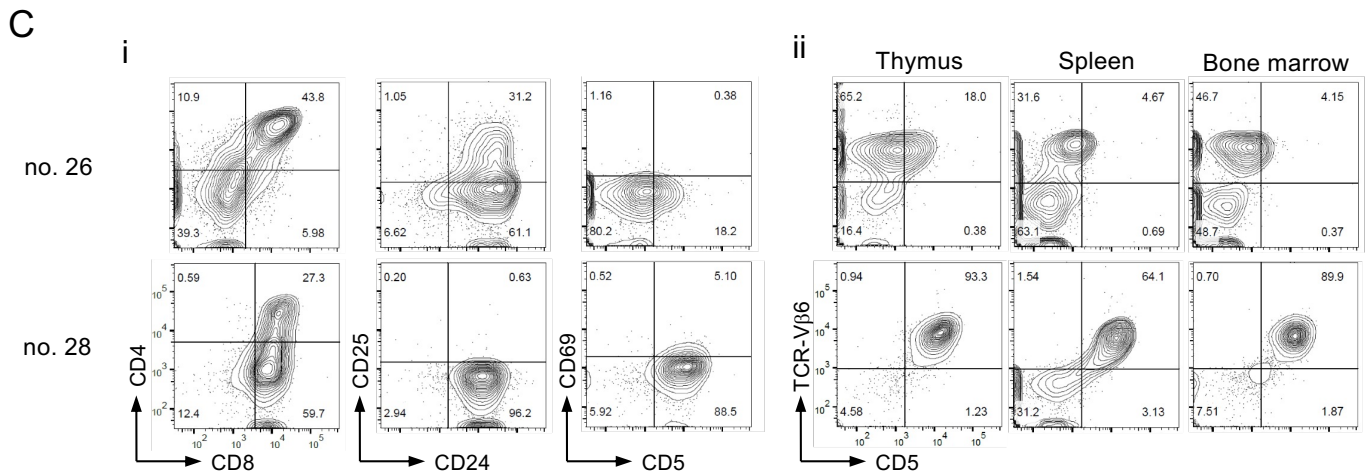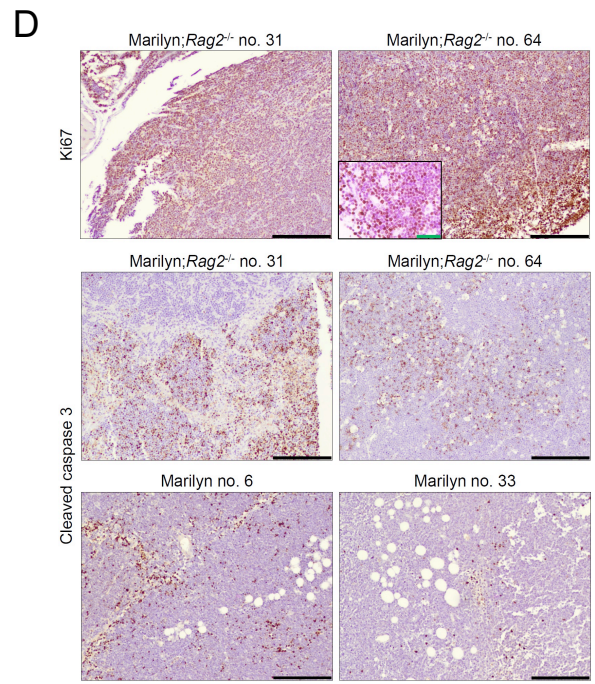

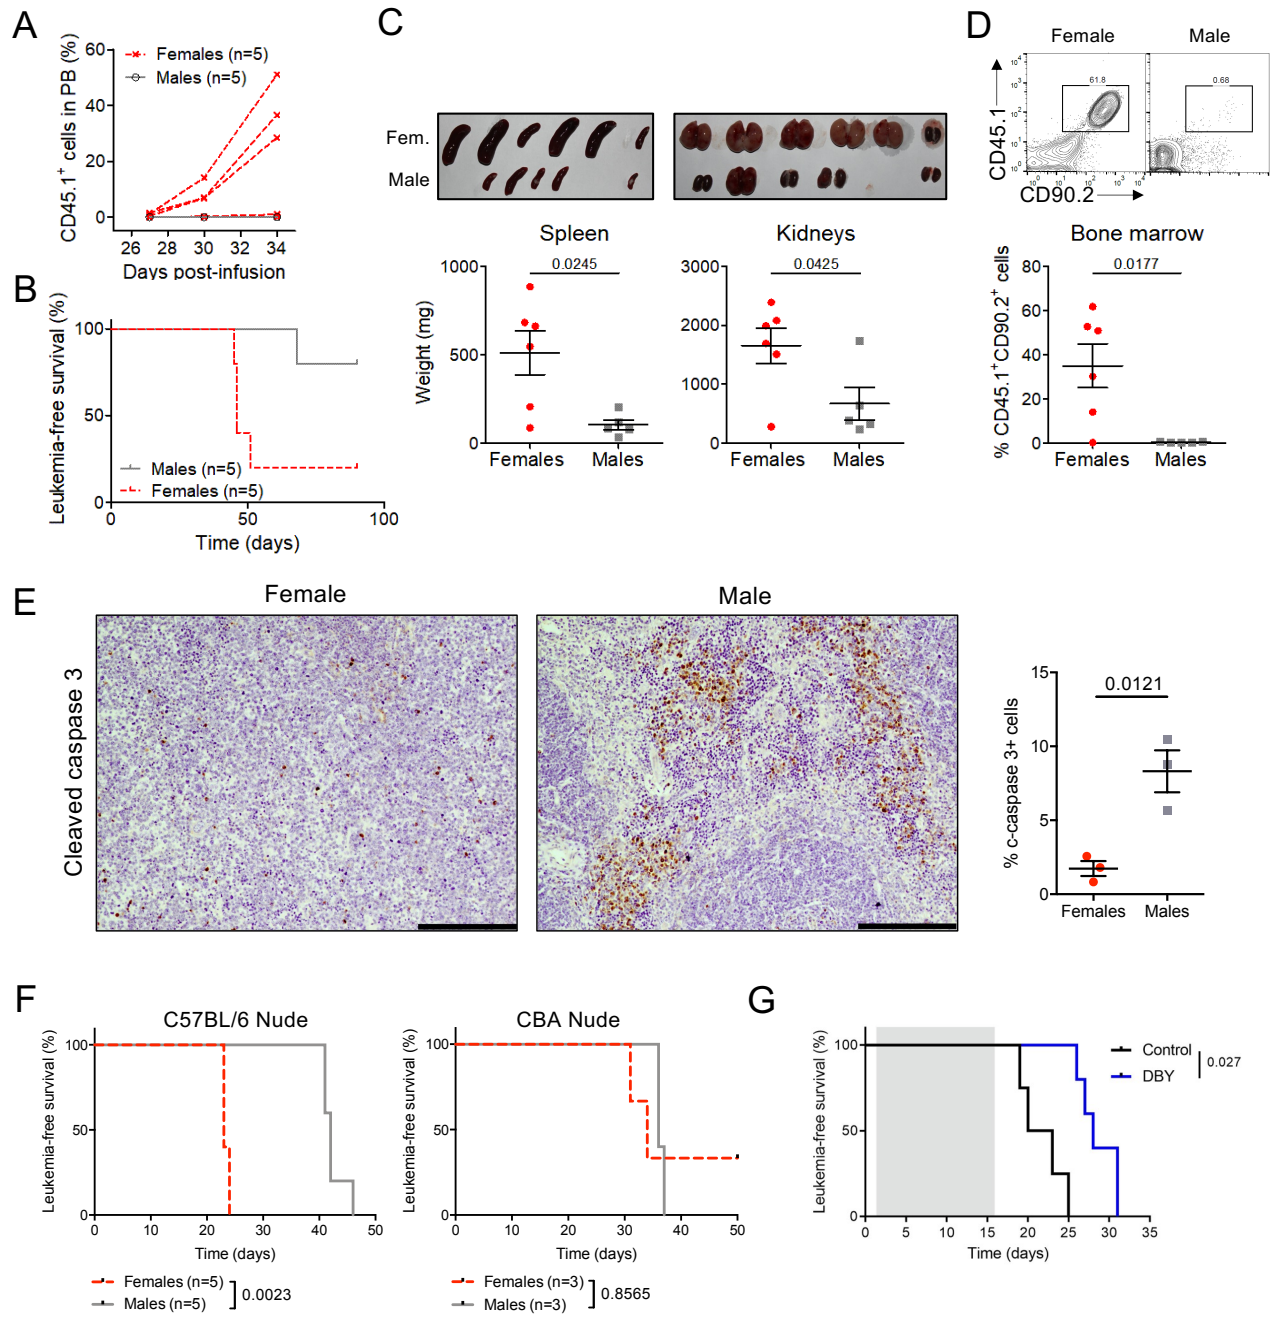

Source: https://www.biorxiv.org/content/biorxiv/early/2024/01/26/2024.01.17.576006.full.pdf
